# Supplementary material for: Genomic Hallmarks of Genes Involved in Chromosomal Translocations in Hematological Cancer
Source: PLoS Comput Biol. 2012 Dec 6;8(12):e1002797. doi: 10.1371/journal.pcbi.1002797 (PMC3516532; doi:10.1371/journal.pcbi.1002797)
Supplement: Table S1 — List of annotated domains showing InterPro identifiers and their classification as type 1 or type2 domains (see Methods). (XLSX) [file pcbi.1002797.s009.xlsx]

## Sheet: 5'TPG domains
INTERPRO_ID	NAME	CLASS	COUNT
IPR002857	Zinc finger, CXXC-type	D	396
IPR000315	Zinc finger, B-box	O	82
IPR019787	Zinc finger, PHD-finger	P	74
IPR003118	Pointed domain	D	60
IPR000712	Apoptosis regulator, Bcl-2, BH	P	56
IPR010507	Zinc finger, MYM-type	P	54
IPR011017	TRASH	O	54
IPR001841	Zinc finger, RING-type	P	52
IPR000219	Dbl homology (DH) domain	O	45
IPR001849	Pleckstrin homology domain	O	44
IPR000504	RNA recognition motif domain	O	43
IPR003093	Apoptosis regulator, Bcl-2 protein, BH4	O	42
IPR001965	Zinc finger, PHD-type	P	40
IPR001881	EGF-like calcium-binding	O	36
IPR000742	Epidermal growth factor-like domain	P	33
IPR006210	Epidermal growth factor-like	P	33
IPR006209	EGF-like domain	P	27
IPR001523	Paired box protein, N-terminal	D	24
IPR005818	Histone H1/H5	D	22
IPR015123	Bcr-Abl oncoprotein oligomerisation	K	19
IPR002717	MOZ/SAS-like protein	H	18
IPR001609	Myosin head, motor domain	O	14
IPR002475	Apoptosis regulator, Bcl2-like	P	14
IPR002100	Transcription factor, MADS-box	D	12
IPR013111	EGF, extracellular	O	11
IPR001370	Baculoviral inhibition of apoptosis protein repeat	P	8
IPR000418	Ets	D	7
IPR001752	Kinesin, motor domain	O	7
IPR000270	Phox/Bem1p	P	6
IPR006594	LisH dimerisation motif	P	6
IPR013524	Acute myeloid leukemia 1 (AML 1)/Runt	D	6
IPR000595	Cyclic nucleotide-binding domain	O	6
IPR000980	SH2 domain	P	6
IPR015880	Zinc finger, C2H2-like	D	5
IPR000299	FERM domain	P	4
IPR018979	FERM, N-terminal	P	4
IPR018980	FERM, C-terminal PH-like domain	P	4
IPR019748	FERM central domain	P	4
IPR019749	Band 4.1 domain	P	4
IPR017986	WD40-repeat-containing domain	P	4
IPR000008	C2 calcium-dependent membrane targeting	P	4
IPR012921	Spen paralogue and orthologue SPOC, C-terminal	O	4
IPR011539	Rel homology	D	4
IPR000210	BTB/POZ-like	P	4
IPR018993	FGFR1 oncogene partner (FOP), N-terminal dimerisation domain	P	3
IPR002909	Cell surface receptor IPT/TIG	P	3
IPR007087	Zinc finger, C2H2	D	3
IPR011598	Helix-loop-helix DNA-binding	D	3
IPR001478	PDZ domain	P	3
IPR001876	Zinc finger, RanBP2-type	P	3
IPR000198	Rho GTPase-activating protein domain	P	3
IPR013724	Spa2 homology (SHD) of GIT	O	3
IPR020683	Ankyrin repeat-containing domain	P	3
IPR000433	Zinc finger, ZZ-type	P	3
IPR001005	SANT/Myb domain	D	3
IPR014778	Myb, DNA-binding	D	3
IPR017877	MYB-like	D	3
IPR015348	Clathrin, heavy chain, linker, core motif	O	2
IPR018029	C2 membrane targeting protein	O	2
IPR015125	Tumour suppressor p53-binding protein-1 Tudor	P	2
IPR018514	Rabaptin coiled-coil domain	P	2
IPR013809	Epsin-like, N-terminal	O	2
IPR001494	Importin-beta, N-terminal	P	2
IPR013069	BTB/POZ	P	2
IPR003649	B-box, C-terminal	O	2
IPR022102	Holliday junction regulator protein family C-terminal	O	2
IPR001487	Bromodomain	P	2
IPR003598	Immunoglobulin subtype 2	O	2
IPR003599	Immunoglobulin subtype	O	2
IPR007110	Immunoglobulin-like	P	2
IPR013258	Striatin, N-terminal	O	2
IPR004009	Myosin, N-terminal, SH3-like	O	1
IPR020575	Heat shock protein Hsp90, N-terminal	O	1
IPR024670	B-cell lymphoma 9, beta-catenin binding domain	P	1
IPR004367	Cyclin, C-terminal	O	1
IPR006671	Cyclin, N-terminal	O	1
IPR013763	Cyclin-like	P	1
IPR012943	Spindle associated	P	1
IPR001026	Epsin domain, N-terminal	O	1
IPR011417	ANTH	O	1
IPR005108	HELP	O	1
IPR020587	DNA recombination/repair protein RecA, monomer-monomer interface	D	1
IPR013098	Immunoglobulin I-set	P	1
IPR013151	Immunoglobulin	O	1
IPR007854	Pre-mRNA polyadenylation factor Fip1	P	1
IPR001715	Calponin homology domain	P	1
IPR012975	NOPS	O	1
IPR012642	Transcription regulator Wos2-domain	O	1

## Sheet: 3'TPG domains
INTERPRO_ID	NAME	CLASS	COUNT
IPR007087	Zinc finger, C2H2	D	237
IPR001245	Serine-threonine/tyrosine-protein kinase catalytic domain	K	226
IPR001487	Bromodomain	P	197
IPR015880	Zinc finger, C2H2-like	D	196
IPR001628	Zinc finger, nuclear hormone receptor-type	D	147
IPR000197	Zinc finger, TAZ-type	H	132
IPR001356	Homeodomain	D	123
IPR003894	TAFH/NHR1	D	114
IPR000980	SH2 domain	P	108
IPR001452	Src homology-3 domain	P	80
IPR000433	Zinc finger, ZZ-type	P	78
IPR000719	Protein kinase, catalytic domain	K	59
IPR002290	Serine/threonine- / dual-specificity protein kinase, catalytic domain	K	59
IPR020635	Tyrosine-protein kinase, catalytic domain	K	59
IPR000210	BTB/POZ-like	P	48
IPR003101	Coactivator CBP, KIX	P	46
IPR012682	Transcription regulator Myc, N-terminal	D	44
IPR000536	Nuclear hormone receptor, ligand-binding, core	D	42
IPR013524	Acute myeloid leukemia 1 (AML 1)/Runt	D	42
IPR002893	Zinc finger, MYND-type	P	38
IPR014896	NHR2-like	P	38
IPR015015	F-actin binding	K	28
IPR010303	Domain of unknown function DUF902, CREBbp	O	26
IPR014744	Nuclear receptor coactivator, CREB-bp-like, interlocking	H	26
IPR013069	BTB/POZ	P	24
IPR011511	Variant SH3	O	22
IPR000418	Ets	D	21
IPR020479	Homeobox, eukaryotic	D	21
IPR013711	Runx inhibition	P	21
IPR000159	Ras-association	P	16
IPR001781	Zinc finger, LIM-type	P	15
IPR001631	DNA topoisomerase I, C-terminal	D	12
IPR001965	Zinc finger, PHD-type	P	12
IPR001766	Transcription factor, fork head	D	12
IPR001478	PDZ domain	P	12
IPR000712	Apoptosis regulator, Bcl-2, BH	P	12
IPR019787	Zinc finger, PHD-finger	P	11
IPR003598	Immunoglobulin subtype 2	O	11
IPR003599	Immunoglobulin subtype	O	11
IPR000253	Forkhead-associated (FHA) domain	P	11
IPR000313	PWWP	P	9
IPR001214	SET domain	P	9
IPR007110	Immunoglobulin-like	P	9
IPR001060	Fps/Fes/Fer/CIP4 homology	P	9
IPR001202	WW/Rsp5/WWP	P	9
IPR002035	von Willebrand factor, type A	P	9
IPR003034	DNA-binding SAP	D	8
IPR000679	Zinc finger, GATA-type	D	8
IPR001609	Myosin head, motor domain	O	7
IPR003093	Apoptosis regulator, Bcl-2 protein, BH4	O	7
IPR003654	Paired-like homeodomain protein, OAR	O	6
IPR011598	Helix-loop-helix DNA-binding	D	6
IPR004827	Basic-leucine zipper domain	D	5
IPR000261	EPS15 homology (EH)	P	5
IPR000014	PAS	O	5
IPR002710	Dilute	P	4
IPR018444	Dil domain	O	4
IPR004367	Cyclin, C-terminal	O	3
IPR006671	Cyclin, N-terminal	O	3
IPR013098	Immunoglobulin I-set	P	3
IPR013151	Immunoglobulin	O	3
IPR001309	Peptidase C14, ICE, catalytic subunit p20	O	3
IPR011600	Peptidase C14, caspase catalytic	O	3
IPR000910	High mobility group, HMG1/HMG2	D	3
IPR001739	Methyl-CpG DNA binding	D	3
IPR002589	Appr-1-p processing	O	3
IPR000315	Zinc finger, B-box	O	3
IPR002475	Apoptosis regulator, Bcl2-like	P	3
IPR015394	Domain of unknown function DUF1973	O	3
IPR013247	SH3, type 3	P	2
IPR003118	Pointed domain	D	2
IPR000873	AMP-dependent synthetase/ligase	O	2
IPR011700	Basic leucine zipper	D	2
IPR021967	Nuclear protein 96	O	2
IPR008336	DNA topoisomerase I, DNA binding, eukaryotic-type	D	2
IPR013499	DNA topoisomerase I, C-terminal, eukaryotic-type	D	2
IPR013500	DNA topoisomerase I, catalytic core, eukaryotic-type	D	2
IPR003616	Post-SET domain	H	2
IPR006560	AWS	H	2
IPR001394	Peptidase C19, ubiquitin carboxyl-terminal hydrolase 2	O	2
IPR015940	Ubiquitin-associated/translation elongation factor EF1B, N-terminal, eukaryote	O	2
IPR000008	C2 calcium-dependent membrane targeting	P	2
IPR010844	Occludin/RNA polymerase II elongation factor, ELL domain	P	2
IPR001453	Molybdopterin binding	O	2
IPR005110	MoeA, N-terminal and linker domain	O	2
IPR005111	MoeA, C-terminal, domain IV	O	2
IPR020817	Molybdenum cofactor synthesis	O	2
IPR001841	Zinc finger, RING-type	P	2
IPR003656	Zinc finger, BED-type predicted	D	2
IPR006703	AIG1	O	2
IPR013767	PAS fold	O	2
IPR002013	Synaptojanin, N-terminal	O	2
IPR007230	Peptidase S59, nucleoporin	O	1
IPR000449	Ubiquitin-associated/translation elongation factor EF1B, N-terminal	P	1
IPR003888	FY-rich, N-terminal	O	1
IPR003889	FY-rich, C-terminal	O	1
IPR018516	FY-rich, C-terminal subgroup	D	1
IPR018518	FY-rich, N-terminal subgroup	D	1
IPR001674	GMP synthase, C-terminal	O	1
IPR001962	Asparagine synthase	O	1
IPR017926	Glutamine amidotransferase type 1	O	1
IPR022310	NAD/GMP synthase	O	1
IPR004953	EB1, C-terminal	P	1
IPR010926	Myosin tail 2	O	1
IPR018556	Domain of unknown function DUF2013	O	1
IPR004148	BAR domain	P	1
IPR004022	DDT domain	D	1
IPR018500	DDT domain, subgroup	D	1
IPR018501	DDT domain superfamily	D	1
IPR011616	bZIP transcription factor, bZIP-1	D	1
IPR014920	Nuclear receptor coactivator, Ncoa-type, interlocking	P	1
IPR000795	Protein synthesis factor, GTP-binding	O	1
IPR004161	Translation elongation factor EFTu/EF1A, domain 2	O	1
IPR013655	PAS fold-3	P	1

## Sheet: Domain classes
IPR_ID	IPR_NAME	CLASSIFIED BY	GO TERM	ABSTRACT	SIGNATURE	SIGNATURE_DB	CLASS	COUNT
IPR002857	Zinc finger, CXXC-type	GO:0003677	DNA binding	Zinc finger (Znf) domains are relatively small protein motifs which contain multiple finger-like protrusions that make tandem contacts with their target molecule. Some of these domains bind zinc, but many do not; instead binding other metals such as iron, or no metal at all. For example, some family members form salt bridges to stabilise the finger-like folds. They were first identified as a DNA-…	zf-CXXC	Pfam	D	396
IPR007087	Zinc finger, C2H2	manual	N/A	Zinc finger (Znf) domains are relatively small protein motifs which contain multiple finger-like protrusions that make tandem contacts with their target molecule. Some of these domains bind zinc, but many do not; instead binding other metals such as iron, or no metal at all. For example, some family members form salt bridges to stabilise the finger-like folds. They were first identified as a DNA-…	zf-C2H2	Pfam	D	240
IPR001245	Serine-threonine/tyrosine-protein kinase catalytic domain	GO:0004672	protein kinase activity	Protein phosphorylation, which plays a key role in most cellular activities, is a reversible process mediated by protein kinases and phosphoprotein phosphatases. Protein kinases catalyse the transfer of the gamma phosphate from nucleotide triphosphates (often ATP) to one or more amino acid residues in a protein substrate side chain, resulting in a conformational change affecting protein function.…	Pkinase_Tyr	Pfam	K	226
IPR015880	Zinc finger, C2H2-like	manual	N/A	Zinc finger (Znf) domains are relatively small protein motifs which contain multiple finger-like protrusions that make tandem contacts with their target molecule. Some of these domains bind zinc, but many do not; instead binding other metals such as iron, or no metal at all. For example, some family members form salt bridges to stabilise the finger-like folds. They were first identified as a DNA-…	ZnF_C2H2	SMART	D	201
IPR001487	Bromodomain	GO:0005515	protein binding	Bromodomains are found in a variety of mammalian, invertebrate and yeast DNA-binding proteins. Bromodomains can interact with acetylated lysine. In some proteins, the classical bromodomain has diverged to such an extent that parts of the region are either missing or contain an insertion (e.g., mammalian protein HRX, Caenorhabditis elegans (UniProtKB Taxonomy ID 6239) hypothetical protein ZK783.4,…	Bromodomain	Pfam	P	199
IPR001628	Zinc finger, nuclear hormone receptor-type	GO:0043565	sequence-specific DNA binding	Steroid or nuclear hormone receptors constitute an important superfamily of transcription regulators that are involved in widely diverse physiological functions, including control of embryonic development, cell differentiation and homeostasis. The receptors function as dimeric molecules in nuclei to regulate the transcription of target genes in a ligand-responsive manner. Nuclear hormone receptor…	zf-C4	Pfam	D	147
IPR001628	Zinc finger, nuclear hormone receptor-type	GO:0003700	sequence-specific DNA binding transcription factor activity	Steroid or nuclear hormone receptors constitute an important superfamily of transcription regulators that are involved in widely diverse physiological functions, including control of embryonic development, cell differentiation and homeostasis. The receptors function as dimeric molecules in nuclei to regulate the transcription of target genes in a ligand-responsive manner. Nuclear hormone receptor…	zf-C4	Pfam	D	147
IPR000197	Zinc finger, TAZ-type	GO:0004402	histone acetyltransferase activity	Zinc finger (Znf) domains are relatively small protein motifs which contain multiple finger-like protrusions that make tandem contacts with their target molecule. Some of these domains bind zinc, but many do not; instead binding other metals such as iron, or no metal at all. For example, some family members form salt bridges to stabilise the finger-like folds. They were first identified as a DNA-…	zf-TAZ	Pfam	H	132
IPR000197	Zinc finger, TAZ-type	GO:0003712	transcription cofactor activity	Zinc finger (Znf) domains are relatively small protein motifs which contain multiple finger-like protrusions that make tandem contacts with their target molecule. Some of these domains bind zinc, but many do not; instead binding other metals such as iron, or no metal at all. For example, some family members form salt bridges to stabilise the finger-like folds. They were first identified as a DNA-…	zf-TAZ	Pfam	P	132
IPR001356	Homeodomain	GO:0043565	sequence-specific DNA binding	The homeobox domain was first identified in a number of drosophila homeotic and segmentation proteins, but is now known to be well-conserved in many other animals, including vertebrates. Hox genes encode homeodomain-containing transcriptional regulators that operate differential genetic programs along the anterior-posterior axis of animal bodies. The domain binds DNA through a helix-turn-helix (H…	Homeobox	Pfam	D	123
IPR001356	Homeodomain	GO:0003700	sequence-specific DNA binding transcription factor activity	The homeobox domain was first identified in a number of drosophila homeotic and segmentation proteins, but is now known to be well-conserved in many other animals, including vertebrates. Hox genes encode homeodomain-containing transcriptional regulators that operate differential genetic programs along the anterior-posterior axis of animal bodies. The domain binds DNA through a helix-turn-helix (H…	Homeobox	Pfam	D	123
IPR003894	TAFH/NHR1	GO:0003700	sequence-specific DNA binding transcription factor activity	The TAF homology (TAFH) or Nervy homology region 1 (NHR1) domain is a domain of 95-100 amino acids present in eukaryotic proteins of the MTG/ETO family and whereof the core ~75-80 residues occur in TAF proteins. The transcription initiation TFIID complex is composed of TATA binding protein (TBP) and a number of TBP-associated factors (TAFs). The TAFH/NHR1 domain is named after fruit fly TATA-box-…	TAFH	Pfam	D	114
IPR000980	SH2 domain	GO:0005515	protein binding	The Src homology 2 (SH2) domain is a protein domain of about 100 amino-acid residues first identified as a conserved sequence region between the oncoproteins Src and Fps. Similar sequences were later found in many other intracellular signal-transducing proteins. SH2 domains function as regulatory modules of intracellular signalling cascades by interacting with high affinity to phosphotyrosine-con…	SH2	Pfam	P	114
IPR000315	Zinc finger, B-box	GO:0005515	ubiquitin-protein ligase activity	Zinc finger (Znf) domains are relatively small protein motifs which contain multiple finger-like protrusions that make tandem contacts with their target molecule. Some of these domains bind zinc, but many do not; instead binding other metals such as iron, or no metal at all. For example, some family members form salt bridges to stabilise the finger-like folds. They were first identified as a DNA-…	zf-B_box	Pfam	O	85
IPR019787	Zinc finger, PHD-finger	GO:0005515	protein binding	Zinc finger (Znf) domains are relatively small protein motifs which contain multiple finger-like protrusions that make tandem contacts with their target molecule. Some of these domains bind zinc, but many do not; instead binding other metals such as iron, or no metal at all. For example, some family members form salt bridges to stabilise the finger-like folds. They were first identified as a DNA-…	PHD	Pfam	P	85
IPR000433	Zinc finger, ZZ-type	manual	N/A	Zinc finger (Znf) domains are relatively small protein motifs which contain multiple finger-like protrusions that make tandem contacts with their target molecule. Some of these domains bind zinc, but many do not; instead binding other metals such as iron, or no metal at all. For example, some family members form salt bridges to stabilise the finger-like folds. They were first identified as a DNA-…	ZZ	Pfam	P	81
IPR001452	Src homology-3 domain	GO:0005515	protein binding	SH3 (src Homology-3) domains are small protein modules containing approximately 50 amino acid residues. They are found in a great variety of intracellular or membrane-associated proteins for example, in a variety of proteins with enzymatic activity, in adaptor proteins that lack catalytic sequences and in cytoskeletal proteins, such as fodrin and yeast actin binding protein ABP-1. The SH3 domain …	SH3_1	Pfam	P	80
IPR000712	Apoptosis regulator, Bcl-2, BH	manual	N/A	Apoptosis, or programmed cell death (PCD), is a common and evolutionarily conserved property of all metazoans. In many biological processes, apoptosis is required to eliminate supernumerary or dangerous (such as pre-cancerous) cells and to promote normal development. Dysregulation of apoptosis can, therefore, contribute to the development of many major diseases including cancer, autoimmunity and …	Bcl-2	Pfam	P	68
IPR003118	Pointed domain	GO:0043565	sequence-specific DNA binding	Transcription factors are protein molecules that bind to specific DNA sequences in the genome, resulting in the induction or inhibition of gene transcription. The ets oncogene is such a factor, possessing a region of 85-90 amino acids known as the ETS (erythroblast transformation specific) domain. This domain is rich in positively-charged and aromatic residues, and binds to purine-rich segments o…	SAM_PNT	Pfam	D	62
IPR000719	Protein kinase, catalytic domain	GO:0004672	protein kinase activity	Protein phosphorylation, which plays a key role in most cellular activities, is a reversible process mediated by protein kinases and phosphoprotein phosphatases. Protein kinases catalyse the transfer of the gamma phosphate from nucleotide triphosphates (often ATP) to one or more amino acid residues in a protein substrate side chain, resulting in a conformational change affecting protein function.…	Pkinase	Pfam	K	59
IPR002290	Serine/threonine- / dual-specificity protein kinase, catalytic domain	GO:0004672	protein kinase activity	Protein phosphorylation, which plays a key role in most cellular activities, is a reversible process mediated by protein kinases and phosphoprotein phosphatases. Protein kinases catalyse the transfer of the gamma phosphate from nucleotide triphosphates (often ATP) to one or more amino acid residues in a protein substrate side chain, resulting in a conformational change affecting protein function.…	S_TKc	SMART	K	59
IPR020635	Tyrosine-protein kinase, catalytic domain	GO:0004713	protein tyrosine kinase activity	Protein phosphorylation, which plays a key role in most cellular activities, is a reversible process mediated by protein kinases and phosphoprotein phosphatases. Protein kinases catalyse the transfer of the gamma phosphate from nucleotide triphosphates (often ATP) to one or more amino acid residues in a protein substrate side chain, resulting in a conformational change affecting protein function.…	TyrKc	SMART	K	59
IPR011017	TRASH	manual	N/A	TRASH domain contains a well-conserved cysteine motif that may be involved in metal coordination. TRASH is encoded by multiple prokaryotic genomes and is present in transcriptional regulators, cation-transporting ATPases and hydrogenases, and is also present as a stand-alone module. The observed domain associations and conserved genome context of TRASH-encoding genes in prokaryotic genomes sugges…	TRASH	SMART	O	54
IPR001841	Zinc finger, RING-type	GO:0005515	protein binding	Zinc finger (Znf) domains are relatively small protein motifs which contain multiple finger-like protrusions that make tandem contacts with their target molecule. Some of these domains bind zinc, but many do not; instead binding other metals such as iron, or no metal at all. For example, some family members form salt bridges to stabilise the finger-like folds. They were first identified as a DNA-…	ZF_RING_2	PROSITE	P	54
IPR010507	Zinc finger, MYM-type	manual	N/A	Zinc finger (Znf) domains are relatively small protein motifs which contain multiple finger-like protrusions that make tandem contacts with their target molecule. Some of these domains bind zinc, but many do not; instead binding other metals such as iron, or no metal at all. For example, some family members form salt bridges to stabilise the finger-like folds. They were first identified as a DNA-…	zf-FCS	Pfam	P	54
IPR000210	BTB/POZ-like	GO:0005515	protein binding	The BTB (for BR-C, ttk and bab) or POZ (for Pox virus and Zinc finger) domain is present near the N terminus of a fraction of zinc finger (Cross-reference to INTERPRO: IPR007087) proteins and in proteins that contain the Cross-reference to INTERPRO: IPR006652 motif such as Kelch and a family of pox virus proteins. The BTB/POZ domain mediates homomeric dimerisation and in some instances heteromeri…	BTB	PROSITE	P	52
IPR001965	Zinc finger, PHD-type	GO:0005515	protein binding	Zinc finger (Znf) domains are relatively small protein motifs which contain multiple finger-like protrusions that make tandem contacts with their target molecule. Some of these domains bind zinc, but many do not; instead binding other metals such as iron, or no metal at all. For example, some family members form salt bridges to stabilise the finger-like folds. They were first identified as a DNA-…	PHD	SMART	P	52
IPR003093	Apoptosis regulator, Bcl-2 protein, BH4	manual	N/A	Apoptosis, or programmed cell death (PCD), is a common and evolutionarily conserved property of all metazoans. In many biological processes, apoptosis is required to eliminate supernumerary or dangerous (such as pre-cancerous) cells and to promote normal development. Dysregulation of apoptosis can, therefore, contribute to the development of many major diseases including cancer, autoimmunity and …	BH4	Pfam	O	49
IPR013524	Acute myeloid leukemia 1 (AML 1)/Runt	GO:0003700	sequence-specific DNA binding transcription factor activity	The AML1 gene is rearranged by the t(8;21) translocation in acute myeloid leukemia. The gene is highly similar to the Drosophila melanogaster (UniProtKB Taxonomy ID 7227) segmentation gene runt and to the mouse transcription factor PEBP2 alpha subunit gene. The region of shared similarity, known as the Runt domain, is responsible for DNA-binding and protein-protein interaction. In addition to the…	Runt	Pfam	D	48
IPR013524	Acute myeloid leukemia 1 (AML 1)/Runt	GO:0003677	DNA binding	The AML1 gene is rearranged by the t(8;21) translocation in acute myeloid leukemia. The gene is highly similar to the Drosophila melanogaster (UniProtKB Taxonomy ID 7227) segmentation gene runt and to the mouse transcription factor PEBP2 alpha subunit gene. The region of shared similarity, known as the Runt domain, is responsible for DNA-binding and protein-protein interaction. In addition to the…	Runt	Pfam	D	48
IPR003101	Coactivator CBP, KIX	GO:0003712	transcription cofactor activity	The nuclear factor CREB activates transcription of target genes in part through direct interactions with the KIX domain of the coactivator CBP in a phosphorylation-dependent manner. This provides a model for activator:coactivator interactions. The KIX domain of CBP also binds to transactivation domains of other nuclear factors including Myb and Jun.	KIX	Pfam	P	46
IPR000219	Dbl homology (DH) domain	GO:0005089	Rho guanyl-nucleotide exchange factor activity	The Rho family GTPases Rho, Rac and CDC42 regulate a diverse array of cellular processes. Like all members of the Ras superfamily, the Rho proteins cycle between active GTP-bound and inactive GDP-bound conformational states. Activation of Rho proteins through release of bound GDP and subsequent binding of GTP, is catalysed by guanine nucleotide exchange factors (GEFs) in the Dbl family. The prote…	RhoGEF	Pfam	O	45
IPR012682	Transcription regulator Myc, N-terminal	GO:0003700	sequence-specific DNA binding transcription factor activity	The class III basic helix-turn-helix (bHLH) transcription factors have proliferative and apoptotic roles and are characterised by the presence of a leucine zipper adjacent to the bHLH domain. The myc oncogene gene was first discovered in small-cell lung cancer cell lines where it is found to be deregulated. Although the biochemical function of the gene product is unknown, as a nuclear protein wit…	Myc_N	Pfam	D	44
IPR001849	Pleckstrin homology domain	GO:0005543	phospholipid binding	The pleckstrin homology (PH) domain is a domain of about 100 residues that occurs in a wide range of proteins involved in intracellular signalling or as constituents of the cytoskeleton. The pleckstrin homology domain commonly found in eukaryotic signalling proteins. The domain family possesses multiple functions including the abilities to bind inositol phosphates, and various proteins. PH domain…	PH	Pfam	O	44
IPR001849	Pleckstrin homology domain	GO:0005515	protein binding	The pleckstrin homology (PH) domain is a domain of about 100 residues that occurs in a wide range of proteins involved in intracellular signalling or as constituents of the cytoskeleton. The pleckstrin homology domain commonly found in eukaryotic signalling proteins. The domain family possesses multiple functions including the abilities to bind inositol phosphates, and various proteins. PH domain…	PH	Pfam	P	44
IPR000504	RNA recognition motif domain	manual	N/A	Many eukaryotic proteins containing one or more copies of a putative RNA-binding domain of about 90 amino acids are known to bind single-stranded RNAs. The largest group of single strand RNA-binding proteins is the eukaryotic RNA recognition motif (RRM) family that contains an eight amino acid RNP-1 consensus sequence. RRM proteins have a variety of RNA binding preferences and functions, and incl…	RRM_1	Pfam	O	43
IPR000536	Nuclear hormone receptor, ligand-binding, core	GO:0003700	sequence-specific DNA binding transcription factor activity	Steroid or nuclear hormone receptors constitute an important superfamily of transcription regulators that are involved in widely diverse physiological functions, including control of embryonic development, cell differentiation and homeostasis. The receptors function as dimeric molecules in nuclei to regulate the transcription of target genes in a ligand-responsive manner. Nuclear hormone receptor…	Hormone_recep	Pfam	D	42
IPR000536	Nuclear hormone receptor, ligand-binding, core	GO:0003707	steroid hormone receptor activity	Steroid or nuclear hormone receptors constitute an important superfamily of transcription regulators that are involved in widely diverse physiological functions, including control of embryonic development, cell differentiation and homeostasis. The receptors function as dimeric molecules in nuclei to regulate the transcription of target genes in a ligand-responsive manner. Nuclear hormone receptor…	Hormone_recep	Pfam	O	42
IPR002893	Zinc finger, MYND-type	manual	N/A	Zinc finger (Znf) domains are relatively small protein motifs which contain multiple finger-like protrusions that make tandem contacts with their target molecule. Some of these domains bind zinc, but many do not; instead binding other metals such as iron, or no metal at all. For example, some family members form salt bridges to stabilise the finger-like folds. They were first identified as a DNA-…	zf-MYND	Pfam	P	38
IPR014896	NHR2-like	manual	N/A	Transcriptional activation and repression are required for control of cell proliferation and differentiation during embryonic development and homeostasis in the adult organism. Perturbations of these processes can lead to the development of cancer. The Eight-Twenty-One (ETO) gene product is able to form complexes with corepressors and deacetylases, such as nuclear receptor corepressor (N-CoR), wh…	NHR2	Pfam	P	38
IPR001881	EGF-like calcium-binding	manual	N/A	A sequence of about forty amino-acid residues found in epidermal growth factor (EGF) has been shown to be present in a large number of membrane-bound and extracellular, mostly animal, proteins. Many of these proteins require calcium for their biological function and a calcium-binding site has been found at the N terminus of some EGF-like domains. Calcium-binding may be crucial for numerous protei…	EGF_CA	Pfam	O	36
IPR006210	Epidermal growth factor-like	GO:0005515	protein binding	Epidermal growth factors and transforming growth factors belong to a general class of proteins that share a repeat pattern involving a number of conserved Cys residues. Growth factors are involved in cell recognition and division. The repeating pattern, especially of cysteines (the so-called EGF repeat), is thought to be important to the 3D structure of the proteins, and hence its recognition by …	EGF	Pfam	P	33
IPR000742	Epidermal growth factor-like domain	GO:0005515	protein binding	A sequence of about thirty to forty amino-acid residues long found in the sequence of epidermal growth factor (EGF) has been shown to be present, in a more or less conserved form, in a large number of other, mostly animal proteins. The functional significance of EGF domains in what appear to be unrelated proteins is not yet clear. However, a common feature is that these repeats are found in the e…	EGF_3	PROSITE	P	33
IPR000418	Ets	GO:0043565	sequence-specific DNA binding	Transcription factors are protein molecules that bind to specific DNA sequences in the genome, resulting in the induction or inhibition of gene transcription. The ets oncogene is such a factor, possessing a region of 85-90 amino acids known as the ETS (erythroblast transformation specific) domain. This domain is rich in positively-charged and aromatic residues, and binds to purine-rich segments o…	Ets	Pfam	D	28
IPR000418	Ets	GO:0003700	sequence-specific DNA binding transcription factor activity	Transcription factors are protein molecules that bind to specific DNA sequences in the genome, resulting in the induction or inhibition of gene transcription. The ets oncogene is such a factor, possessing a region of 85-90 amino acids known as the ETS (erythroblast transformation specific) domain. This domain is rich in positively-charged and aromatic residues, and binds to purine-rich segments o…	Ets	Pfam	D	28
IPR015015	F-actin binding	GO:0004715	non-membrane spanning protein tyrosine kinase activity	The F-actin binding domain forms a compact bundle of four antiparallel alpha-helices, which are arranged in a left-handed topology. Binding of F-actin to the F-actin binding domain may result in cytoplasmic retention and subcellular distribution of the protein, as well as possible inhibition of protein function.	F_actin_bind	Pfam	K	28
IPR006209	EGF-like domain	GO:0005515	protein binding	A sequence of about thirty to forty amino-acid residues long found in the sequence of epidermal growth factor (EGF) has been shown to be present, in a more or less conserved form, in a large number of other, mostly animal proteins. The list of proteins currently known to contain one or more copies of an EGF-like pattern is large and varied. The functional significance of EGF domains in what appea…	EGF	Pfam	P	27
IPR014744	Nuclear receptor coactivator, CREB-bp-like, interlocking	GO:0004402	histone acetyltransferase activity	This entry represents the interlocking domain of the eukaryotic nuclear receptor coactivators CREBP and p300. The interlocking domain forms a 3-helical non-globular array that forms interlocked heterodimers with its target. Nuclear receptors are ligand-activated transcription factors involved in the regulation of many processes, including development, reproduction and homeostasis. Nuclear recepto…	Creb_binding	Pfam	H	26
IPR010303	Domain of unknown function DUF902, CREBbp	manual	N/A	This domain of unknown function is found in several transcriptional co-activators including the CREB-binding protein, Cross-reference to EC: 2.3.1.48, which is an acetyltransferase that acetylates histones, giving a specific tag for transcriptional activation. CREB-binding protein also acetylates non-histone proteins.	DUF902	Pfam	O	26
IPR013069	BTB/POZ	GO:0005515	protein binding	The BTB (for BR-C, ttk and bab) or POZ (for Pox virus and Zinc finger) domain is present near the N terminus of a fraction of zinc finger (Cross-reference to INTERPRO: IPR007087) proteins and in proteins that contain the Cross-reference to INTERPRO: IPR006652 motif such as Kelch and a family of pox virus proteins. The BTB/POZ domain mediates homomeric dimerisation and in some instances heteromeri…	BTB	Pfam	P	26
IPR014744	Nuclear receptor coactivator, CREB-bp-like, interlocking	GO:0003713	transcription coactivator activity	This entry represents the interlocking domain of the eukaryotic nuclear receptor coactivators CREBP and p300. The interlocking domain forms a 3-helical non-globular array that forms interlocked heterodimers with its target. Nuclear receptors are ligand-activated transcription factors involved in the regulation of many processes, including development, reproduction and homeostasis. Nuclear recepto…	Creb_binding	Pfam	P	26
IPR001523	Paired box protein, N-terminal	GO:0003677	DNA binding	The paired box is a conserved 124 amino acid N-terminal domain of unknown function that usually, but not always, precedes a homeobox domain (see Cross-reference to INTERPRO: IPR001356). Paired box genes are expressed in alternate segments of the developing fruit fly, the observed grouping of segments into pairs depending on the position of the segment in the segmental array, and not on the identi…	PAX	Pfam	D	24
IPR005818	Histone H1/H5	GO:0003677	DNA binding	Histone proteins have central roles in both chromatin organisation (as structural units of the nucleosome) and gene regulation (as dynamic components that have a direct impact on DNA transcription and replication). Eukaryotic DNA wraps around a histone octamer to form a nucleosome, the first order of compaction of eukaryotic chromatin. The core histone octamer is composed of a central H3-H4 tetra…	Linker_histone	Pfam	D	22
IPR011511	Variant SH3	manual	N/A	SH3 (src Homology-3) domains are small protein modules containing approximately 50 amino acid residues. They are found in a great variety of intracellular or membrane-associated proteins for example, in a variety of proteins with enzymatic activity, in adaptor proteins that lack catalytic sequences and in cytoskeletal proteins, such as fodrin and yeast actin binding protein ABP-1. The SH3 domain …	SH3_2	Pfam	O	22
IPR020479	Homeobox, eukaryotic	manual	N/A	The homeobox is a 60-residue motif first identified in a number of Drosophila homeotic and segmentation proteins, but now known to be well- conserved in many other animals, including vertebrates. Proteins containing homeobox domains are likely to play an important role in development - most are known to be sequence-specific DNA-binding transcription factors. The domain binds DNA through a helix-t…	HOMEOBOX	PRINTS	D	21
IPR001609	Myosin head, motor domain	manual	N/A	Muscle contraction is caused by sliding between the thick and thin filaments of the myofibril. Myosin is a major component of thick filaments and exists as a hexamer of 2 heavy chains, 2 alkali light chains, and 2 regulatory light chains. The heavy chain can be subdivided into the N-terminal globular head and the C-terminal coiled-coil rod-like tail, although some forms have a globular region in …	Myosin_head	Pfam	O	21
IPR013711	Runx inhibition	manual	N/A	This domain lies to the C terminus of Runx-related transcription factors and homologous proteins (AML, CBF-alpha, PEBP2). Its function might be to interact with functional cofactors.	RunxI	Pfam	P	21
IPR015123	Bcr-Abl oncoprotein oligomerisation	GO:0004674	protein serine/threonine kinase activity	This entry represents the oligomerisation domain of the breakpoint cluster region oncoprotein Bcr, and the Bcr/Abl (Abelson-leukemia-virus) fusion protein created by a reciprocal (9;22) fusion. Brc displays serine/threonine protein kinase activity (Cross-reference to EC: 2.7.11.1), acting as a GTPase-activating protein for RAC1 and CDC42. Brc promotes the exchange of RAC or CDC42-bound GDP by GTP…	Bcr-Abl_Oligo	Pfam	K	19
IPR015123	Bcr-Abl oncoprotein oligomerisation	GO:0005096	GTPase activator activity	This entry represents the oligomerisation domain of the breakpoint cluster region oncoprotein Bcr, and the Bcr/Abl (Abelson-leukemia-virus) fusion protein created by a reciprocal (9;22) fusion. Brc displays serine/threonine protein kinase activity (Cross-reference to EC: 2.7.11.1), acting as a GTPase-activating protein for RAC1 and CDC42. Brc promotes the exchange of RAC or CDC42-bound GDP by GTP…	Bcr-Abl_Oligo	Pfam	P	19
IPR002717	MOZ/SAS-like protein	GO:0016747	transferase activity, transferring acyl groups other than amino-acyl groups	Moz is a monocytic leukemia Zn_finger protein and the SAS protein from Saccharomyces cerevisiae (UniProtKB Taxonomy ID 4932) (Baker's yeast) is involved in silencing the Hmr locus. These proteins were reported to be homologous to acetyltransferases but this similarity is not supported by standard sequence analysis.	MOZ_SAS	Pfam	H	18
IPR002475	Apoptosis regulator, Bcl2-like	manual	N/A	Active cell suicide (apoptosis) is induced by events such as growth factor withdrawal and toxins. It is controlled by regulators, which have either an inhibitory effect on programmed cell death (anti-apoptotic) or block the protective effect of inhibitors (pro-apoptotic). Many viruses have found a way of countering defensive apoptosis by encoding their own anti-apoptosis genes preventing their ta…	BCL2_FAMILY	PROSITE	P	17
IPR000159	Ras-association	manual	N/A	Proteins with this domain are mostly RasGTP effectors and include guanine-nucleotide releasing factor in mammals. This factor stimulates the dissociation of GDP from the Ras-related RALA and RALB GTPases, which allows GTP binding and activation of the GTPases. It interacts and acts as an effector molecule for R-ras, K-Ras and Rap. The domain is also present in a number of other proteins among the…	RA	Pfam	P	16
IPR001478	PDZ domain	GO:0005515	protein binding	PDZ domains are found in diverse signalling proteins in bacteria, yeasts, plants, insects and vertebrates. PDZ domains can occur in one or multiple copies and are nearly always found in cytoplasmic proteins. They bind either the carboxyl-terminal sequences of proteins or internal peptide sequences. In most cases, interaction between a PDZ domain and its target is constitutive, with a binding affi…	PDZ	Pfam	P	15
IPR001781	Zinc finger, LIM-type	manual	N/A	Zinc finger (Znf) domains are relatively small protein motifs which contain multiple finger-like protrusions that make tandem contacts with their target molecule. Some of these domains bind zinc, but many do not; instead binding other metals such as iron, or no metal at all. For example, some family members form salt bridges to stabilise the finger-like folds. They were first identified as a DNA-…	LIM	Pfam	P	15
IPR003599	Immunoglobulin subtype	manual	N/A	The basic structure of immunoglobulin (Ig) molecules is a tetramer of two light chains and two heavy chains linked by disulphide bonds. There are two types of light chains: kappa and lambda, each composed of a constant domain (CL) and a variable domain (VL). There are five types of heavy chains: alpha, delta, epsilon, gamma and mu, all consisting of a variable domain (VH) and three (in alpha, del…	IG	SMART	O	13
IPR003598	Immunoglobulin subtype 2	manual	N/A	The basic structure of immunoglobulin (Ig) molecules is a tetramer of two light chains and two heavy chains linked by disulphide bonds. There are two types of light chains: kappa and lambda, each composed of a constant domain (CL) and a variable domain (VL). There are five types of heavy chains: alpha, delta, epsilon, gamma and mu, all consisting of a variable domain (VH) and three (in alpha, del…	IGc2	SMART	O	13
IPR001631	DNA topoisomerase I, C-terminal	GO:0003677	DNA binding	DNA topoisomerases regulate the number of topological links between two DNA strands (i.e. change the number of superhelical turns) by catalysing transient single- or double-strand breaks, crossing the strands through one another, then resealing the breaks. These enzymes have several functions: to remove DNA supercoils during transcription and DNA replication; for strand breakage during recombinat…	EUTPISMRASEI	PRINTS	D	12
IPR001766	Transcription factor, fork head	GO:0003700	sequence-specific DNA binding transcription factor activity	The fork head protein of Drosophila melanogaster (UniProtKB Taxonomy ID 7227), a transcription factor that promotes terminal rather than segmental development, contains neither homeodomains nor zinc-fingers characteristic of other transcription factors. Instead, it contains a distinct type of DNA-binding region, containing around 100 amino acids, which has since been identified in a number of tra…	Fork_head	Pfam	D	12
IPR001766	Transcription factor, fork head	GO:0043565	sequence-specific DNA binding	The fork head protein of Drosophila melanogaster (UniProtKB Taxonomy ID 7227), a transcription factor that promotes terminal rather than segmental development, contains neither homeodomains nor zinc-fingers characteristic of other transcription factors. Instead, it contains a distinct type of DNA-binding region, containing around 100 amino acids, which has since been identified in a number of tra…	Fork_head	Pfam	D	12
IPR002100	Transcription factor, MADS-box	GO:0003677	DNA binding	Human serum response factor (SRF) is a ubiquitous nuclear protein important for cell proliferation and differentiation. SRF function is essential for transcriptional regulation of numerous growth-factor-inducible genes, such as c-fos oncogene and muscle-specific actin genes. A core domain of around 90 amino acids is sufficient for the activities of DNA-binding, dimerisation and interaction with a…	SRF-TF	Pfam	D	12
IPR001631	DNA topoisomerase I, C-terminal	GO:0003917	DNA topoisomerase type I activity	DNA topoisomerases regulate the number of topological links between two DNA strands (i.e. change the number of superhelical turns) by catalysing transient single- or double-strand breaks, crossing the strands through one another, then resealing the breaks. These enzymes have several functions: to remove DNA supercoils during transcription and DNA replication; for strand breakage during recombinat…	EUTPISMRASEI	PRINTS	O	12
IPR002100	Transcription factor, MADS-box	GO:0046983	protein dimerization activity	Human serum response factor (SRF) is a ubiquitous nuclear protein important for cell proliferation and differentiation. SRF function is essential for transcriptional regulation of numerous growth-factor-inducible genes, such as c-fos oncogene and muscle-specific actin genes. A core domain of around 90 amino acids is sufficient for the activities of DNA-binding, dimerisation and interaction with a…	SRF-TF	Pfam	P	12
IPR013111	EGF, extracellular	manual	N/A	A sequence of about thirty to forty amino-acid residues long found in the sequence of epidermal growth factor (EGF) has been shown to be present, in a more or less conserved form, in a large number of other, mostly animal proteins. The list of proteins currently known to contain one or more copies of an EGF-like pattern is large and varied. The functional significance of EGF domains in what appea…	EGF_2	Pfam	O	11
IPR000253	Forkhead-associated (FHA) domain	GO:0005515	protein binding	The forkhead-associated (FHA) domain is a phosphopeptide recognition domain found in many regulatory proteins. It displays specificity for phosphothreonine-containing epitopes but will also recognise phosphotyrosine with relatively high affinity. It spans approximately 80-100 amino acid residues folded into an 11-stranded beta sandwich, which sometimes contain small helical insertions between the…	FHA	Pfam	P	11
IPR007110	Immunoglobulin-like	GO:0005515	protein binding	The basic structure of immunoglobulin (Ig) molecules is a tetramer of two light chains and two heavy chains linked by disulphide bonds. There are two types of light chains: kappa and lambda, each composed of a constant domain (CL) and a variable domain (VL). There are five types of heavy chains: alpha, delta, epsilon, gamma and mu, all consisting of a variable domain (VH) and three (in alpha, del…	IG_LIKE	PROSITE	P	11
IPR011598	Helix-loop-helix DNA-binding	manual	N/A	The helix-loop-helix (HLH) DNA-binding domain consists of a closed bundle of four helices in a left-handed twist with two crossover connections. The HLH domain directs dimerisation, and is juxtaposed to basic regions to create a DNA interaction interface surface that recognises specific DNA sequences. Basic region/HLH (bHLH) proteins regulate diverse biological pathways. bHLH proteins include Myo…	HLH	Pfam	D	9
IPR000313	PWWP	manual	N/A	Upon characterisation of WHSC1, a gene mapping to the Wolf-Hirschhornsyndrome critical region and at its C terminus similar to the Drosophila melanogaster (UniProtKB Taxonomy ID 7227) ASH1/trithorax group proteins, a novel protein domain designated PWWP domain was identified. The PWWP domain is named after a conserved Pro-Trp-Trp-Pro motif. It is present in proteins of nuclear origin and plays a …	PWWP	Pfam	P	9
IPR001060	Fps/Fes/Fer/CIP4 homology	manual	N/A	The FCH domain is a short conserved region of around 60 amino acids first described as a region of homology between FER and CIP4 proteins. Many proteins containing an FCH domain are involved in the regulation of cytoskeletal rearrangements, vesicular transport and endocytosis. In the CIP4 protein the FCH domain binds to microtubules. The FCH domain is always found N-terminally and is followed by …	FCH	Pfam	P	9
IPR002035	von Willebrand factor, type A	GO:0005515	protein binding	The von Willebrand factor is a large multimeric glycoprotein found in blood plasma. Mutant forms are involved in the aetiology of bleeding disorders. In von Willebrand factor, the type A domain (vWF) is the prototype for a protein superfamily. The vWF domain is found in various plasma proteins: complement factors B, C2, CR3 and CR4; the integrins (I-domains); collagen types VI, VII, XII and XIV; …	VWA	Pfam	P	9
IPR001202	WW/Rsp5/WWP	GO:0005515	protein binding	Synonym(s): Rsp5 or WWP domain The WW domain is a short conserved region in a number of unrelated proteins, which folds as a stable, triple stranded beta-sheet. This short domain of approximately 40 amino acids, may be repeated up to four times in some proteins. The name WW or WWP derives from the presence of two signature tryptophan residues that are spaced 20-23 amino acids apart and are presen…	WW	Pfam	P	9
IPR001214	SET domain	GO:0005515	protein binding	The SET domain appears generally as one part of a larger multidomain protein, and recently there were described three structures of very different proteins with distinct domain compositions: Neurospora crassa (UniProtKB Taxonomy ID 5141) DIM-5, a member of the Su(var) family of HKMTs which methylate histone H3 on lysine 9,human SET7 (also called SET9), which methylates H3 on lysine 4 and garden p…	SET	Pfam	P	9
IPR000679	Zinc finger, GATA-type	GO:0043565	sequence-specific DNA binding	Zinc finger (Znf) domains are relatively small protein motifs which contain multiple finger-like protrusions that make tandem contacts with their target molecule. Some of these domains bind zinc, but many do not; instead binding other metals such as iron, or no metal at all. For example, some family members form salt bridges to stabilise the finger-like folds. They were first identified as a DNA-…	GATA	Pfam	D	8
IPR000679	Zinc finger, GATA-type	GO:0003700	sequence-specific DNA binding transcription factor activity	Zinc finger (Znf) domains are relatively small protein motifs which contain multiple finger-like protrusions that make tandem contacts with their target molecule. Some of these domains bind zinc, but many do not; instead binding other metals such as iron, or no metal at all. For example, some family members form salt bridges to stabilise the finger-like folds. They were first identified as a DNA-…	GATA	Pfam	D	8
IPR003034	DNA-binding SAP	manual	N/A	The SAP (after SAF-A/B, Acinus and PIAS) motif is a putative DNA binding domain found in diverse nuclear proteins involved in chromosomal organisation, including in apoptosis. In yeast, SAP is found in the most distal N-terminal region of E3 SUMO-protein ligase SIZ1, where it is involved in nuclear localization.	SAP	Pfam	D	8
IPR001370	Baculoviral inhibition of apoptosis protein repeat	manual	N/A	The baculovirus inhibitor of apoptosis protein repeat (BIR) is a domain of tandem repeats separated by a variable length linker that seems to confer cell death-preventing activity. The BIR domains characterise the Inhibitor of Apoptosis (IAP) family of proteins (MEROPS proteinase inhibitor family I32, clan IV) that suppress apoptosis by interacting with and inhibiting the enzymatic activity of bo…	BIR	Pfam	P	8
IPR001752	Kinesin, motor domain	manual	N/A	Kinesin is a microtubule-associated force-producing protein that may play a role in organelle transport. The kinesin motor activity is directed toward the microtubule's plus end. Kinesin is an oligomeric complex composed of two heavy chains and two light chains. The maintenance of the quaternary structure does not require interchain disulphide bonds. The heavy chain is composed of three structura…	Kinesin	Pfam	O	7
IPR003654	Paired-like homeodomain protein, OAR	manual	N/A	This 14 amino acid motif has been identified within the C-terminal region of several Paired-like homeodomain (HD) containing proteins. It was named OAR domain after the initials of otp, aristaless, and rax. Although it has been proposed that this domain could be important for transactivation and be involved in protein-protein interactions or DNA binding, is function is not yet known. Some protein…	OAR	Pfam	O	6
IPR000008	C2 calcium-dependent membrane targeting	GO:0005515	protein binding	The C2 domain is a Ca2+-dependent membrane-targeting module found in many cellular proteins involved in signal transduction or membrane trafficking. C2 domains are unique among membrane targeting domains in that they show wide range of lipid selectivity for the major components of cell membranes, including phosphatidylserine and phosphatidylcholine. This C2 domain is about 116 amino-acid residues…	C2	Pfam	P	6
IPR000270	Phox/Bem1p	GO:0005515	protein binding	The Phox and Bem1p domain, is present in many eukaryotic cytoplasmic signalling proteins. The domain adopts a beta-grasp fold, similar to that found in ubiquitin and Ras-binding domains. A motif, variously termed OPR, PC and AID, represents the most conserved region of the majority of PB1 domains, and is necessary for PB1 domain function. This function is the formation of PB1 domain heterodimers,…	PB1	Pfam	P	6
IPR006594	LisH dimerisation motif	GO:0005515	protein binding	The LisH motif is found in a large number of eukaryotic proteins, from metazoa, fungi and plants that have a wide range of functions. The recently solved structure of the LisH domain in the N-terminal region of LIS1 depicted it as a novel dimerization motif, and that other structural elements are likely to play an important role in dimerisation. A sequence motif, LisH, has been identified in the …	LISH	PROSITE	P	6
IPR000595	Cyclic nucleotide-binding domain	manual	N/A	Proteins that bind cyclic nucleotides (cAMP or cGMP) share a structural domain of about 120 residues. The best studied of these proteins is the prokaryotic catabolite gene activator (also known as the cAMP receptor protein) (gene crp) where such a domain is known to be composed of three alpha-helices and a distinctive eight-stranded, antiparallel beta-barrel structure. There are six invariant ami…	cNMP_binding	Pfam	O	6
IPR004827	Basic-leucine zipper domain	GO:0003700	sequence-specific DNA binding transcription factor activity	The basic-leucine zipper (bZIP) domain transcription factors of eukaryotic are proteins that contain a basic region mediating sequence-specific DNA-binding followed by a leucine zipper region (see Cross-reference to INTERPRO: IPR002158) required for dimerization.	BZIP_BASIC	PROSITE	D	5
IPR004827	Basic-leucine zipper domain	GO:0043565	sequence-specific DNA binding	The basic-leucine zipper (bZIP) domain transcription factors of eukaryotic are proteins that contain a basic region mediating sequence-specific DNA-binding followed by a leucine zipper region (see Cross-reference to INTERPRO: IPR002158) required for dimerization.	BZIP_BASIC	PROSITE	D	5
IPR000261	EPS15 homology (EH)	GO:0005515	protein binding	The EH (for Eps15 Homology) domain is a protein-protein interaction module of approximately 95 residues which was originally identified as a repeated sequence present in three copies at the N terminus of the tyrosine kinase substrates Eps15 and Eps15R. The EH domain was subsequently found in several proteins implicated in endocytosis, vesicle transport and signal transduction in organisms ranging…	EH	PROSITE	P	5
IPR000014	PAS	manual	N/A	PAS domains are involved in many signalling proteins where they are used as a signal sensor domain. PAS domains appear in archaea, bacteria and eukaryotes. Several PAS-domain proteins are known to detect their signal by way of an associated cofactor. Haeme, flavin, and a 4-hydroxycinnamyl chromophore are used in different proteins. The PAS domain was named after three proteins that it occurs in: …	PAS	PROSITE	O	5
IPR011539	Rel homology	GO:0003700	sequence-specific DNA binding transcription factor activity	The Rel homology domain (RHD) is found in a family of eukaryotic transcription factors, which includes NF-kappaB, Dorsal, Relish, NFAT, among others. Some of these transcription factors appear to form multi-protein DNA-bound complexes. Phosphorylation of the RHD appears to play a role in the regulation of some of these transcription factors, acting to modulate the expression of their target genes…	RHD	Pfam	D	4
IPR004367	Cyclin, C-terminal	manual	N/A	Cyclins are eukaryotic proteins that play an active role in controlling nuclear cell division cycles, and regulate cyclin dependent kinases (CDKs). Cyclins, together with the p34 (cdc2) or cdk2 kinases, form the Maturation Promoting Factor (MPF). There are two main groups of cyclins, G1/S cyclins, which are essential for the control of the cell cycle at the G1/S (start) transition, and G2/M cycli…	Cyclin_C	Pfam	O	4
IPR006671	Cyclin, N-terminal	manual	N/A	Cyclins are eukaryotic proteins that play an active role in controlling nuclear cell division cycles, and regulate cyclin dependent kinases (CDKs). Cyclins, together with the p34 (cdc2) or cdk2 kinases, form the Maturation Promoting Factor (MPF). There are two main groups of cyclins, G1/S cyclins, which are essential for the control of the cell cycle at the G1/S (start) transition, and G2/M cycli…	Cyclin_N	Pfam	O	4
IPR018444	Dil domain	manual	N/A	Dilute encodes a novel type of myosin heavy chain, with a tail, or C-terminal, region that has elements of both type II (alpha-helical coiled-coil) and type I (non-coiled-coil) myosin heavy chains. The DIL non alpha-helical domain is found in dilute myosin heavy chain proteins and other myosins. In mouse the dilute protein may play a role in the elaboration, maintenance, or function of cellular p…	DIL	Pfam	O	4
IPR013151	Immunoglobulin	manual	N/A	Members of the immunoglobulin superfamily are found in hundreds of proteins of different functions. Examples include antibodies, the giant muscle kinase titin and receptor tyrosine kinases. Immunoglobulin-like domains may be involved in protein-protein and protein-ligand interactions. The Pfam alignments do not include the first and last strand of the immunoglobulin-like domain.	ig	Pfam	O	4
IPR012921	Spen paralogue and orthologue SPOC, C-terminal	manual	N/A	Spen (split end) proteins regulate the expression of key transcriptional effectors in diverse signalling pathways. They are large proteins characterised by N-terminal RNA-binding motifs and a highly conserved C-terminal SPOC (Spen paralog and ortholog C-terminal) domain. The function of the SPOC domain is unknown, but the SPOC domain of the SHARP Spen protein has been implicated in the interactio…	SPOC	Pfam	O	4
IPR018980	FERM, C-terminal PH-like domain	manual	N/A	The FERM domain (F for 4.1 protein, E for ezrin, R for radixin and M for moesin) is a widespread protein module involved in localising proteins to the plasma membrane. FERM domains are found in a number of cytoskeletal-associated proteins that associate with various proteins at the interface between the plasma membrane and the cytoskeleton. The FERM domain is located at the N terminus of the majo…	FERM_C	Pfam	P	4
IPR019748	FERM central domain	manual	N/A	The FERM domain (F for 4.1 protein, E for ezrin, R for radixin and M for moesin) is a widespread protein module involved in localising proteins to the plasma membrane. FERM domains are found in a number of cytoskeletal-associated proteins that associate with various proteins at the interface between the plasma membrane and the cytoskeleton. The FERM domain is located at the N terminus of the majo…	FERM_M	Pfam	P	4
IPR013098	Immunoglobulin I-set	manual	N/A	The basic structure of immunoglobulin (Ig) molecules is a tetramer of two light chains and two heavy chains linked by disulphide bonds. There are two types of light chains: kappa and lambda, each composed of a constant domain (CL) and a variable domain (VL). There are five types of heavy chains: alpha, delta, epsilon, gamma and mu, all consisting of a variable domain (VH) and three (in alpha, del…	I-set	Pfam	P	4
IPR019749	Band 4.1 domain	manual	N/A	The FERM domain (F for 4.1 protein, E for ezrin, R for radixin and M for moesin) is a widespread protein module involved in localising proteins to the plasma membrane. FERM domains are found in a number of cytoskeletal-associated proteins that associate with various proteins at the interface between the plasma membrane and the cytoskeleton. The FERM domain is located at the N terminus of the majo…	B41	SMART	P	4
IPR002710	Dilute	GO:0005515	protein binding	Dilute encodes a novel type of myosin heavy chain, with a tail, or C-terminal, region that has elements of both type II (alpha-helical coiled-coil) and type I (non-coiled-coil) myosin heavy chains. The DIL non alpha-helical domain is found in dilute myosin heavy chain proteins and other myosins. In mouse the dilute protein may play a role in the elaboration, maintenance, or function of cellular p…	DILUTE	PROSITE	P	4
IPR000299	FERM domain	manual	N/A	The FERM domain (F for 4.1 protein, E for ezrin, R for radixin and M for moesin) is a widespread protein module involved in localising proteins to the plasma membrane. FERM domains are found in a number of cytoskeletal-associated proteins that associate with various proteins at the interface between the plasma membrane and the cytoskeleton. The FERM domain is located at the N terminus of the majo…	FERM_3	PROSITE	P	4
IPR017986	WD40-repeat-containing domain	GO:0005515	protein binding	WD-40 repeats (also known as WD or beta-transducin repeats) are short ~40 amino acid motifs, often terminating in a Trp-Asp (W-D) dipeptide. WD40 repeats usually assume a 7-8 bladed beta-propeller fold, but proteins have been found with 4 to 16 repeated units, which also form a circularised beta-propeller structure. WD-repeat proteins are a large family found in all eukaryotes and are implicated …	WD_REPEATS_REGION	PROSITE	P	4
IPR018979	FERM, N-terminal	manual	N/A	This domain is the N-terminal ubiquitin-like structural domain of the FERM domain. The FERM domain (F for 4.1 protein, E for ezrin, R for radixin and M for moesin) is a widespread protein module involved in localising proteins to the plasma membrane. FERM domains are found in a number of cytoskeletal-associated proteins that associate with various proteins at the interface between the plasma memb…	FERM_N	Pfam	P	4
IPR017877	MYB-like	manual	N/A	The retroviral oncogene v-myb, and its cellular counterpart c-myb, encode nuclear DNA-binding proteins. These belong to the SANT domain family that specifically recognise the sequence YAAC(G/T)G. In myb, one of the most conserved regions consisting of three tandem repeats has been shown to be involved in DNA-binding.	MYB_LIKE	PROSITE	D	3
IPR001005	SANT/Myb domain	GO:0003677	DNA binding	The retroviral oncogene v-myb, and its cellular counterpart c-myb, encode nuclear DNA-binding proteins. These belong to the SANT domain family that specifically recognise the sequence YAAC(G/T)G. In myb, one of the most conserved regions consisting of three tandem repeats has been shown to be involved in DNA-binding.	SANT	SMART	D	3
IPR000910	High mobility group, HMG1/HMG2	manual	N/A	High mobility group (HMG or HMGB) proteins are a family of relatively low molecular weight non-histone components in chromatin. HMG1 (also called HMG-T in fish) and HMG2 are two highly related proteins that bind single-stranded DNA preferentially and unwind double-stranded DNA. Although they have no sequence specificity, they have a high affinity for bent or distorted DNA, and bend linear DNA. HM…	HMG_box	Pfam	D	3
IPR001739	Methyl-CpG DNA binding	GO:0003677	DNA binding	Methylation at CpG dinucleotide, the most common DNA modification in eukaryotes, has been correlated with gene silencing associated with various phenomena such as genomic imprinting, transposon and chromosome X inactivation, differentiation, and cancer. Effects of DNA methylation are mediated through proteins which bind to symmetrically methylated CpGs. Such proteins contain a specific domain of …	MBD	Pfam	D	3
IPR014778	Myb, DNA-binding	manual	N/A	The retroviral oncogene v-myb, and its cellular counterpart c-myb, encode nuclear DNA-binding proteins. These belong to the SANT domain family that specifically recognise the sequence YAAC(G/T)G. In myb, one of the most conserved regions consisting of three tandem repeats has been shown to be involved in DNA-binding.	Myb_DNA-binding	Pfam	D	3
IPR002589	Appr-1-p processing	manual	N/A	The Macro or A1pp domain is a module of about 180 amino acids which can bind ADP-ribose, an NAD metabolite or related ligands. Binding to ADP-ribose could be either covalent or non-covalent: in certain cases it is believed to bind non-covalently; while in other cases (such as Aprataxin) it appears to bind both non-covalently through a zinc finger motif, and covalently through a separate region of…	Macro	Pfam	O	3
IPR001309	Peptidase C14, ICE, catalytic subunit p20	GO:0004197	cysteine-type endopeptidase activity	This group of sequences represent the p20 subunit found in caspases. Caspases are composed of an N-terminal pro-domain that is cleaved during activation, and C-terminal catalytic and interaction domains. All caspases contain two essential caspase catalytic domains: the p20 subunit (20 kDa) and the p10 subunit (10 kDa) (Cross-reference to INTERPRO: IPR002138), which are derived from the p45 (45 kD…	CASPASE_P20	PROSITE	O	3
IPR011600	Peptidase C14, caspase catalytic	GO:0004197	cysteine-type endopeptidase activity	In the MEROPS database peptidases and peptidase homologues are grouped into clans and families. Clans are groups of families for which there is evidence of common ancestry based on a common structural fold: Each clan is identified with two letters, the first representing the catalytic type of the families included in the clan (with the letter 'P' being used for a clan containing families of more …	Peptidase_C14	Pfam	O	3
IPR015394	Domain of unknown function DUF1973	manual	N/A	These functionally uncharacterised domains are found in various eukaryotic calcium-dependent chloride channels.	DUF1973	Pfam	O	3
IPR013724	Spa2 homology (SHD) of GIT	manual	N/A	GIT proteins are signalling integrators with GTPase-activating function which may be involved in the organisation of the cytoskeletal matrix assembled at active zones (CAZ). The function of the CAZ might be to define sites of neurotransmitter release. Mutations in the Spa2 homology domain (SHD) domain of GIT1 described here interfere with the association of GIT1 with Piccolo, beta-PIX, and focal …	GIT_SHD	Pfam	O	3
IPR000198	Rho GTPase-activating protein domain	manual	N/A	Members of the Rho family of small G proteins transduce signals from plasma-membrane receptors and control cell adhesion, motility and shape by actin cytoskeleton formation. Like all other GTPases, Rho proteins act as molecular switches, with an active GTP-bound form and an inactive GDP-bound form. The active conformation is promoted by guanine-nucleotide exchange factors, and the inactive state …	RhoGAP	Pfam	P	3
IPR001876	Zinc finger, RanBP2-type	manual	N/A	Zinc finger (Znf) domains are relatively small protein motifs which contain multiple finger-like protrusions that make tandem contacts with their target molecule. Some of these domains bind zinc, but many do not; instead binding other metals such as iron, or no metal at all. For example, some family members form salt bridges to stabilise the finger-like folds. They were first identified as a DNA-…	zf-RanBP	Pfam	P	3
IPR020683	Ankyrin repeat-containing domain	manual	N/A	This entry represents the ankyrin repeat-containing domain. These domains contain multiple repeats of a beta(2)-alpha(2) motif. The ankyrin repeat is one of the most common protein-protein interaction motifs in nature. Ankyrin repeats are tandemly repeated modules of about 33 amino acids. They occur in a large number of functionally diverse proteins mainly from eukaryotes. The few known examples …	DUF3447	Pfam	P	3
IPR018993	FGFR1 oncogene partner (FOP), N-terminal dimerisation domain	manual	N/A	Fibroblast growth factor receptor 1 (FGFR1) oncogene partner (FOP) is a centrosomal protein that is involved in anchoring microtubules to centrosomes. This domain includes a Lis-homology motif. It forms an alpha-helical bundle and is involved in dimerisation.	FOP_dimer	Pfam	P	3
IPR002909	Cell surface receptor IPT/TIG	GO:0005515	protein binding	This family consists of a domain that has an immunoglobulin like fold. These domains are found in cell surface receptors such as Met and Ron as well as in intracellular transcription factors where it is involved in DNA binding. The Ron tyrosine kinase receptor shares with the members of its subfamily (Met and Sea) a unique functional feature: the control of cell dissociation, motility, and invasi…	TIG	Pfam	P	3
IPR003656	Zinc finger, BED-type predicted	GO:0003677	DNA binding	Zinc finger (Znf) domains are relatively small protein motifs which contain multiple finger-like protrusions that make tandem contacts with their target molecule. Some of these domains bind zinc, but many do not; instead binding other metals such as iron, or no metal at all. For example, some family members form salt bridges to stabilise the finger-like folds. They were first identified as a DNA-…	zf-BED	Pfam	D	2
IPR013499	DNA topoisomerase I, C-terminal, eukaryotic-type	GO:0003677	DNA binding	DNA topoisomerases regulate the number of topological links between two DNA strands (i.e. change the number of superhelical turns) by catalysing transient single- or double-strand breaks, crossing the strands through one another, then resealing the breaks. These enzymes have several functions: to remove DNA supercoils during transcription and DNA replication; for strand breakage during recombinat…	TOPEUc	SMART	D	2
IPR013500	DNA topoisomerase I, catalytic core, eukaryotic-type	GO:0003677	DNA binding	DNA topoisomerases regulate the number of topological links between two DNA strands (i.e. change the number of superhelical turns) by catalysing transient single- or double-strand breaks, crossing the strands through one another, then resealing the breaks. These enzymes have several functions: to remove DNA supercoils during transcription and DNA replication; for strand breakage during recombinat…	Topoisom_I	Pfam	D	2
IPR008336	DNA topoisomerase I, DNA binding, eukaryotic-type	GO:0003677	DNA binding	DNA topoisomerases regulate the number of topological links between two DNA strands (i.e. change the number of superhelical turns) by catalysing transient single- or double-strand breaks, crossing the strands through one another, then resealing the breaks. These enzymes have several functions: to remove DNA supercoils during transcription and DNA replication; for strand breakage during recombinat…	Topoisom_I_N	Pfam	D	2
IPR011700	Basic leucine zipper	GO:0043565	sequence-specific DNA binding	The basic-leucine zipper (bZIP) transcription factors of eukaryotes are proteins that contain a basic region mediating sequence-specific DNA-binding, followed by a leucine zipper region (see Cross-reference to INTERPRO: IPR002158), which is required for dimerization.	bZIP_2	Pfam	D	2
IPR011700	Basic leucine zipper	GO:0003700	sequence-specific DNA binding transcription factor activity	The basic-leucine zipper (bZIP) transcription factors of eukaryotes are proteins that contain a basic region mediating sequence-specific DNA-binding, followed by a leucine zipper region (see Cross-reference to INTERPRO: IPR002158), which is required for dimerization.	bZIP_2	Pfam	D	2
IPR006560	AWS	GO:0018024	histone-lysine N-methyltransferase activity	This domain, Associated With SET, of unknown function is found in eukaryotic proteins of unknown function. This domain, as the name suggests, is often found in association with the SET domain (Cross-reference to INTERPRO: IPR001214), suggesting a role in gene regulation by methylation of lysine residues in histones and other proteins.	AWS	PROSITE	H	2
IPR003616	Post-SET domain	manual	N/A	This region is found in a number of histone lysine methyltransferases (HMTase), C-terminal to the SET domain; it is generally described as the post-SET domain. Histone lysine methylation is part of the histone code that regulated chromatin function and epigenetic control of gene function. Histone lysine methyltransferases (HMTase) differ both in their substrate specificity for the various accepto…	POST_SET	PROSITE	H	2
IPR020817	Molybdenum cofactor synthesis	manual	N/A	Eukaryotic and prokaryotic molybdoenzymes require a molybdopterin cofactor (MoCF) for their activity. The biosynthesis of this cofactor involves a complex multistep enzymatic pathway. One of the eukaryotic proteins involved in this pathway is the Drosophila protein cinnamon which is highly similar to gephyrin, a rat microtubule-associated protein which was thought to anchor the glycine receptor t…	Molyb_syn	TIGRFAMs	O	2
IPR002013	Synaptojanin, N-terminal	GO:0042578	phosphoric ester hydrolase activity	Synaptic vesicles are recycled with remarkable speed and precision in nerve terminals. A major recycling pathway involves clathrin-mediated endocytosis at endocytic zones located around sites of release. Different 'accessory' proteins linked to this pathway have been shown to alter the shape and composition of lipid membranes, to modify membrane-coat protein interactions, and to influence actin p…	Syja_N	Pfam	O	2
IPR015348	Clathrin, heavy chain, linker, core motif	manual	N/A	Proteins synthesized on the ribosome and processed in the endoplasmic reticulum are transported from the Golgi apparatus to the trans-Golgi network (TGN), and from there via small carrier vesicles to their final destination compartment. These vesicles have specific coat proteins (such as clathrin or coatomer) that are important for cargo selection and direction of transport. Clathrin coats contai…	Clathrin-link	Pfam	O	2
IPR006703	AIG1	manual	N/A	This entry represents a domain found in Arabidopsis protein AIG1 which appears to be involved in plant resistance to bacteria. The Arabidopsis disease resistance gene RPS2 is involved in recognition of bacterial pathogens carrying the avirulence gene avrRpt2. AIG1 (avrRpt2-induced gene) exhibits RPS2- and avrRpt2-dependent induction early after infection with Pseudomonas syringae (UniProtKB Taxon…	AIG1	Pfam	O	2
IPR003649	B-box, C-terminal	manual	N/A	The B-box C-terminal domain is a coiled coil region C-terminal to (some) B-Box domains. It is found in transcription intermediary factor 1-alpha, which associates with DNA-bound estrogen receptors; ring finger protein, a putative transcriptional regulator; and the GTP-binding protein Ard-1.	BBC	SMART	O	2
IPR000873	AMP-dependent synthetase/ligase	manual	N/A	A number of prokaryotic and eukaryotic enzymes, which appear to act via an ATP-dependent covalent binding of AMP to their substrate, share a region of sequence similarity. This region is a Ser/Thr/Gly-rich domain that is further characterised by a conserved Pro-Lys-Gly triplet. The family of enzymes includes luciferase, long chain fatty acid Co-A ligase, acetyl-CoA synthetase and various other cl…	AMP-binding	Pfam	O	2
IPR013499	DNA topoisomerase I, C-terminal, eukaryotic-type	GO:0003917	DNA topoisomerase type I activity	DNA topoisomerases regulate the number of topological links between two DNA strands (i.e. change the number of superhelical turns) by catalysing transient single- or double-strand breaks, crossing the strands through one another, then resealing the breaks. These enzymes have several functions: to remove DNA supercoils during transcription and DNA replication; for strand breakage during recombinat…	TOPEUc	SMART	O	2
IPR013500	DNA topoisomerase I, catalytic core, eukaryotic-type	GO:0003918	DNA topoisomerase (ATP-hydrolyzing) activity	DNA topoisomerases regulate the number of topological links between two DNA strands (i.e. change the number of superhelical turns) by catalysing transient single- or double-strand breaks, crossing the strands through one another, then resealing the breaks. These enzymes have several functions: to remove DNA supercoils during transcription and DNA replication; for strand breakage during recombinat…	Topoisom_I	Pfam	O	2
IPR008336	DNA topoisomerase I, DNA binding, eukaryotic-type	GO:0003917	DNA topoisomerase type I activity	DNA topoisomerases regulate the number of topological links between two DNA strands (i.e. change the number of superhelical turns) by catalysing transient single- or double-strand breaks, crossing the strands through one another, then resealing the breaks. These enzymes have several functions: to remove DNA supercoils during transcription and DNA replication; for strand breakage during recombinat…	Topoisom_I_N	Pfam	O	2
IPR001394	Peptidase C19, ubiquitin carboxyl-terminal hydrolase 2	GO:0004221	ubiquitin thiolesterase activity	In the MEROPS database peptidases and peptidase homologues are grouped into clans and families. Clans are groups of families for which there is evidence of common ancestry based on a common structural fold: Each clan is identified with two letters, the first representing the catalytic type of the families included in the clan (with the letter 'P' being used for a clan containing families of more …	UCH	Pfam	O	2
IPR018029	C2 membrane targeting protein	manual	N/A	The C2 domain is a Ca2+-dependent membrane-targeting module found in many cellular proteins involved in signal transduction or membrane trafficking. C2 domains are unique among membrane targeting domains in that they show wide range of lipid selectivity for the major components of cell membranes, including phosphatidylserine and phosphatidylcholine. This C2 domain is about 116 amino-acid residues…	C2	PROSITE	O	2
IPR022102	Holliday junction regulator protein family C-terminal	manual	N/A	Although this family is conserved in the Holliday junction regulator, HJURP, proteins in higher eukaryotes, alongside an Scm3, Cross-reference to PFAM: PF10384, family, its exact function is not known. The C-terminal region of Scm3 proteins has been evolving rapidly, and this short repeat at the C-terminal end can be present in up to two copies in the higher eukaryotes.	HJURP_C	Pfam	O	2
IPR001453	Molybdopterin binding	manual	N/A	Eukaryotic and prokaryotic molybdoenzymes require a molybdopterin cofactor (MoCF) for their activity. The biosynthesis of this cofactor involves a complex multistep enzymatic pathway. One of the eukaryotic proteins involved in this pathway is the Drosophila protein cinnamon which is highly similar to gephyrin, a rat microtubule-associated protein which was thought to anchor the glycine receptor t…	MoCF_biosynth	Pfam	O	2
IPR005111	MoeA, C-terminal, domain IV	manual	N/A	The majority of molybdenum-containing enzymes utilise a molybdenum cofactor (MoCF or Moco) consisting of a Mo atom coordinated via a cis-dithiolene moiety to molybdopterin (MPT). MoCF is ubiquitous in nature, and the pathway for MoCF biosynthesis is conserved in all three domains of life. MoCF-containing enzymes function as oxidoreductases in carbon, nitrogen, and sulphur metabolism. In Escherich…	MoeA_C	Pfam	O	2
IPR005110	MoeA, N-terminal and linker domain	manual	N/A	This entry represents the N-terminal and linker domains of the MoeA protein. Proteins in this family contain two structural domains, one of which contains the conserved DGXA motif. These two domains are found in proteins involved in biosynthesis of molybdopterin cofactor however the exact molecular function of this region is uncertain. The majority of molybdenum-containing enzymes utilise a molyb…	MoeA_N	Pfam	O	2
IPR021967	Nuclear protein 96	manual	N/A	Nup96 (often known by the name of its yeast homologue Nup145C) is part of the Nup84 heptameric complex in the nuclear pore complex. Nup96 complexes with Sec13 in the middle of the heptamer. The function of the heptamer is to coat the curvature of the nuclear pore complex between the inner and outer nuclear membranes. Nup96 is predicted to be an alpha helical solenoid. The interaction between Nup9…	Nup96	Pfam	O	2
IPR013258	Striatin, N-terminal	manual	N/A	This domain is associated with the N terminus of striatin. Striatin is an intracellular protein which has a caveolin-binding motif, a coiled-coil structure, a calmodulin-binding site, and a WD (Cross-reference to INTERPRO: IPR001680) repeat domain. It acts as a scaffold protein and is involved in signalling pathways.	Striatin	Pfam	O	2
IPR015940	Ubiquitin-associated/translation elongation factor EF1B, N-terminal, eukaryote	manual	N/A	UBA domains are a commonly occurring sequence motif of approximately 45 amino acid residues that are found in diverse proteins involved in the ubiquitin/proteasome pathway, DNA excision-repair, and cell signalling via protein kinases. The human homologue of yeast Rad23A is one example of a nucleotide excision-repair protein that contains both an internal and a C-terminal UBA domain. The solution …	UBA	PROSITE	O	2
IPR011700	Basic leucine zipper	GO:0046983	protein dimerization activity	The basic-leucine zipper (bZIP) transcription factors of eukaryotes are proteins that contain a basic region mediating sequence-specific DNA-binding, followed by a leucine zipper region (see Cross-reference to INTERPRO: IPR002158), which is required for dimerization.	bZIP_2	Pfam	P	2
IPR018514	Rabaptin coiled-coil domain	GO:0005096	GTPase activator activity	Regeneration of injured axons at neuromuscular junctions has been assumed to be regulated by extra-cellular factors that promote neurite outgrowth. A novel neurite outgrowth factor from chick denervated skeletal muscle has been cloned and characterised. The protein, termed neurocrescin (rabaptin), has been shown to be secreted in an activity-dependent fashion. Rabaptin is a 100kDa coiled-coil pro…	Rabaptin	Pfam	P	2
IPR013247	SH3, type 3	manual	N/A	SH3 (src Homology-3) domains are small protein modules containing approximately 50 amino acid residues. They are found in a great variety of intracellular or membrane-associated proteins for example, in a variety of proteins with enzymatic activity, in adaptor proteins that lack catalytic sequences and in cytoskeletal proteins, such as fodrin and yeast actin binding protein ABP-1. The SH3 domain …	SH3_3	Pfam	P	2
IPR010844	Occludin/RNA polymerase II elongation factor, ELL domain	manual	N/A	This represents a conserved region approximately 100 residues long within eukaryotic occludin proteins and the RNA polymerase II elongation factor ELL. Occludin is an integral membrane protein that localises to tight junctions, while ELL is an elongation factor that can increase the catalytic rate of RNA polymerase II transcription by suppressing transient pausing by polymerase at multiple sites …	Occludin_ELL	Pfam	P	2
IPR015125	Tumour suppressor p53-binding protein-1 Tudor	manual	N/A	This domain consist of ten beta-strands and a carboxy-terminal alpha-helix. The amino-terminal five beta-strands and the C-terminal five beta-strands adopt folds that are identical to each other. The domain is essential for the recruitment of proteins to double stranded breaks in DNA, which is mediated by interaction with methylated Lys 79 of histone H3.	53-BP1_Tudor	Pfam	P	2
IPR001494	Importin-beta, N-terminal	manual	N/A	Karyopherins are a group of proteins involved in transporting molecules through the pores of the nuclear envelope. Karyopherins, which may act as importins or exportins, are part of the Importin-beta super-family, which all share a similar three-dimensional structure. Members of the importin-beta (karyopherin-beta) family can bind and transport cargo by themselves, or can form heterodimers with i…	IBN_N	Pfam	P	2
IPR013809	Epsin-like, N-terminal	manual	N/A	The ENTH (Epsin N-terminal homology) domain is approximately 150 amino acids in length and is always found located at the N-termini of proteins. The domain forms a compact globular structure, composed of 9 alpha-helices connected by loops of varying length. The general topology is determined by three helical hairpins that are stacked consecutively with a right hand twist. An N-terminal helix fold…	ENTH	PROSITE	O	2
IPR013767	PAS fold	manual	N/A	PAS domains are involved in many signalling proteins where they are used as a signal sensor domain. PAS domains appear in archaea, bacteria and eukaryotes. Several PAS-domain proteins are known to detect their signal by way of an associated cofactor. Haeme, flavin, and a 4-hydroxycinnamyl chromophore are used in different proteins. The PAS domain was named after three proteins that it occurs in: …	PAS	Pfam	O	2
IPR020587	DNA recombination/repair protein RecA, monomer-monomer interface	GO:0003677	DNA binding	The recA gene product is a multifunctional enzyme that plays a role in homologous recombination, DNA repair and induction of the SOS response. In homologous recombination, the protein functions as a DNA-dependent ATPase, promoting synapsis, heteroduplex formation and strand exchange between homologous DNAs. RecA also acts as a protease cofactor that promotes autodigestion of the lexA product and …	RECA_3	PROSITE	D	1
IPR011616	bZIP transcription factor, bZIP-1	GO:0043565	sequence-specific DNA binding	The basic-leucine zipper (bZIP) transcription factors of eukaryotic are proteins that contain a basic region mediating sequence-specific DNA-binding followed by a leucine zipper region (see Cross-reference to INTERPRO: IPR002158) required for dimerization.	bZIP_1	Pfam	D	1
IPR011616	bZIP transcription factor, bZIP-1	GO:0003700	sequence-specific DNA binding transcription factor activity	The basic-leucine zipper (bZIP) transcription factors of eukaryotic are proteins that contain a basic region mediating sequence-specific DNA-binding followed by a leucine zipper region (see Cross-reference to INTERPRO: IPR002158) required for dimerization.	bZIP_1	Pfam	D	1
IPR004022	DDT domain	manual	N/A	This domain is predicted to be a DNA binding domain. The DDT domain is named after (DNA binding homeobox and Different Transcription factors). It is found in foetal Alzheimer antigen and several hypothetical and uncharacterised proteins.	DDT	Pfam	D	1
IPR018516	FY-rich, C-terminal subgroup	GO:0003677	DNA binding	The 'FY-rich' domain C-terminal region is sometimes closely juxtaposed with the N-terminal region (Cross-reference to INTERPRO: IPR003888), but sometimes is far distant. It is of unknown function, but occurs frequently in chromatin-associated proteins like trithorax and its homologues.	FYRC	SMART	D	1
IPR018518	FY-rich, N-terminal subgroup	GO:0003677	DNA binding	The 'FY-rich' domain N-terminal region is sometimes closely juxtaposed with the C-terminal region (Cross-reference to INTERPRO: IPR003889), but sometimes is far distant. It is of unknown function, but occurs frequently in chromatin-associated proteins like trithorax and its homologues.	FYRN	SMART	D	1
IPR018500	DDT domain, subgroup	manual	N/A	This domain is predicted to be a DNA binding domain. The DDT domain is named after (DNA binding homeobox and Different Transcription factors). It is found in foetal Alzheimer antigen and several hypothetical and uncharacterised proteins.	DDT	SMART	D	1
IPR018501	DDT domain superfamily	manual	N/A	This domain is predicted to be a DNA binding domain. The DDT domain is named after (DNA binding homeobox and Different Transcription factors). It is found in foetal Alzheimer antigen and several hypothetical and uncharacterised proteins.	DDT	PROSITE	D	1
IPR011417	ANTH	manual	N/A	AP180 is an endocytotic accessory protein that has been implicated in the formation of clathrin-coated pits. The domain is involved in phosphatidylinositol 4,5-bisphosphate binding and is a universal adaptor for nucleation of clathrin coats.	ANTH	Pfam	O	1
IPR004161	Translation elongation factor EFTu/EF1A, domain 2	manual	N/A	Translation elongation factors are responsible for two main processes during protein synthesis on the ribosome. EF1A (or EF-Tu) is responsible for the selection and binding of the cognate aminoacyl-tRNA to the A-site (acceptor site) of the ribosome. EF2 (or EF-G) is responsible for the translocation of the peptidyl-tRNA from the A-site to the P-site (peptidyl-tRNA site) of the ribosome, thereby f…	GTP_EFTU_D2	Pfam	O	1
IPR011417	ANTH	GO:0005543	phospholipid binding	AP180 is an endocytotic accessory protein that has been implicated in the formation of clathrin-coated pits. The domain is involved in phosphatidylinositol 4,5-bisphosphate binding and is a universal adaptor for nucleation of clathrin coats.	ANTH	Pfam	O	1
IPR018556	Domain of unknown function DUF2013	manual	N/A	This domain is found at the C terminus of some proteins, including Ldb17, NCK-interacting protein and uncharacterised proteins. Ldb17 is involved in the regulation of endocytosis in yeast. NCK-interacting protein (also known as WASP-interacting SH3-domain protein) induces microspike formation in vivo. In vitro, stimulates N-WASP-induced ARP2/3 complex activation in the absence of CDC42. It may pl…	DUF2013	Pfam	O	1
IPR001962	Asparagine synthase	GO:0004066	asparagine synthase (glutamine-hydrolyzing) activity	This domain is always found associated with (Cross-reference to INTERPRO: IPR000583). Family members that contain this domain catalyse the conversion of aspartate to asparagine. Asparagine synthetase B (Cross-reference to EC: 6.3.5.4) catalyzes the assembly of asparagine from aspartate, Mg(2+)ATP, and glutamine. The three-dimensional architecture of the N-terminal domain of asparagine synthetase …	Asn_synthase	Pfam	O	1
IPR017926	Glutamine amidotransferase type 1	manual	N/A	Glutamine amidotransferase (GATase) enzymes catalyse the removal of the ammonia group from glutamine and then transfer this group to a substrate to form a new carbon-nitrogen group. The GATase domain exists either as a separate polypeptidic subunit or as part of a larger polypeptide fused in different ways to a synthase domain. Two classes of GATase domains have been identified: class-I (also kno…	GATase	Pfam	O	1
IPR001674	GMP synthase, C-terminal	GO:0003922	GMP synthase (glutamine-hydrolyzing) activity	The amidotransferase family of enzymes utilises the ammonia derived from the hydrolysis of glutamine for a subsequent chemical reaction catalyzed by the same enzyme. The ammonia intermediate does not dissociate into solution during the chemical transformations. GMP synthetase is a glutamine amidotransferase from the <i>de novo</i> purine biosynthetic pathway. The C-terminal domain is specific to …	GMP_synt_C	Pfam	O	1
IPR010926	Myosin tail 2	manual	N/A	These proteins share a region of sequence similarity with the tail of myosin (for example Cross-reference to SWISSPROT: O00159). Myosins act as molecular motors.	Myosin_TH1	Pfam	O	1
IPR022310	NAD/GMP synthase	manual	N/A	NAD+ synthase (Cross-reference to EC: 6.3.5.1) catalyzes the last step in the biosynthesis of nicotinamide adenine dinucleotide and is induced by stress factors such as heat shock and glucose limitation. The three-dimensional structure of NH3-dependent NAD+ synthetase from Bacillus subtilis (UniProtKB Taxonomy ID 1423), in its free form and in complex with ATP shows that the enzyme consists of a …	NAD_synthase	Pfam	O	1
IPR020587	DNA recombination/repair protein RecA, monomer-monomer interface	GO:0008094	DNA-dependent ATPase activity	The recA gene product is a multifunctional enzyme that plays a role in homologous recombination, DNA repair and induction of the SOS response. In homologous recombination, the protein functions as a DNA-dependent ATPase, promoting synapsis, heteroduplex formation and strand exchange between homologous DNAs. RecA also acts as a protease cofactor that promotes autodigestion of the lexA product and …	RECA_3	PROSITE	O	1
IPR001026	Epsin domain, N-terminal	manual	N/A	The ENTH (Epsin N-terminal homology) domain is approximately 150 amino acids in length and is always found located at the N-termini of proteins. The domain forms a compact globular structure, composed of 9 alpha-helices connected by loops of varying length. The general topology is determined by three helical hairpins that are stacked consecutively with a right hand twist. An N-terminal helix fold…	ENTH	Pfam	O	1
IPR003889	FY-rich, C-terminal	manual	N/A	The 'FY-rich' domain C-terminal region is sometimes closely juxtaposed with the N-terminal region (Cross-reference to INTERPRO: IPR003888), but sometimes is far distant. It is of unknown function, but occurs frequently in chromatin-associated proteins like trithorax and its homologues.	FYRC	Pfam	O	1
IPR003888	FY-rich, N-terminal	manual	N/A	The 'FY-rich' domain N-terminal region is sometimes closely juxtaposed with the C-terminal region (Cross-reference to INTERPRO: IPR003889), but sometimes is far distant. It is of unknown function, but occurs frequently in chromatin-associated proteins like trithorax and its homologues.	FYRN	Pfam	O	1
IPR020575	Heat shock protein Hsp90, N-terminal	manual	N/A	Prokaryotes and eukaryotes respond to heat shock and other forms of environmental stress by inducing synthesis of heat-shock proteins (hsp). The 90 kDa heat shock protein, Hsp90, is one of the most abundant proteins in eukaryotic cells, comprising 1-2% of cellular proteins under non-stress conditions. Its contribution to various cellular processes including signal transduction, protein folding, p…	HEATSHOCK90	PRINTS	O	1
IPR005108	HELP	manual	N/A	The HELP (Hydrophobic ELP) domain is found in EMAP and EMAP-like proteins (ELPs). Although called a domain it contains a predicted transmembrane helix and may not form a globular domain. It is also not clear if these proteins localize to membranes.	HELP	Pfam	O	1
IPR000795	Protein synthesis factor, GTP-binding	GO:0003924	GTPase activity	Elongation factors belong to a family of proteins that promote the GTP-dependent binding of aminoacyl tRNA to the A site of ribosomes during protein biosynthesis, and catalyse the translocation of the synthesised protein chain from the A to the P site. The proteins are all relatively similar in the vicinity of their C-termini, and are also highly similar to a range of proteins that includes the n…	GTP_EFTU	Pfam	O	1
IPR007230	Peptidase S59, nucleoporin	manual	N/A	In the MEROPS database peptidases and peptidase homologues are grouped into clans and families. Clans are groups of families for which there is evidence of common ancestry based on a common structural fold: Each clan is identified with two letters, the first representing the catalytic type of the families included in the clan (with the letter 'P' being used for a clan containing families of more …	Nucleoporin2	Pfam	O	1
IPR004009	Myosin, N-terminal, SH3-like	manual	N/A	This domain has an SH3-like fold. It is found at the N terminus of many but not all myosins. The function of this domain is unknown.	Myosin_N	Pfam	O	1
IPR012975	NOPS	manual	N/A	This domain is found C-terminal to 1 or 2 Cross-reference to INTERPRO: IPR000504 domains in NONA and PSP1 proteins.	NOPS	Pfam	O	1
IPR012642	Transcription regulator Wos2-domain	manual	N/A	Proteins containing the Wos2 domain are involved in the regulation of the cell cycle and are Myb-related transcriptional activators.	Wos2	Pfam	O	1
IPR004148	BAR domain	GO:0005515	protein binding	Endocytosis and intracellular transport involve several mechanistic steps: (1) for the internalisation of cargo molecules, the membrane needs to bend to form a vesicular structure, which requires membrane curvature and a rearrangement of the cytoskeleton; (2) following its formation, the vesicle has to be pinched off the membrane; (3) the cargo has to be subsequently transported through the cell …	BAR	Pfam	P	1
IPR014920	Nuclear receptor coactivator, Ncoa-type, interlocking	GO:0003713	transcription coactivator activity	This entry represents the interlocking domain of the eukaryotic nuclear receptor coactivators Ncoa1, Ncoa2 and Ncoa3. The interlocking domain forms a 3-helical non-globular array that forms interlocked heterodimers with its target. Nuclear receptors are ligand-activated transcription factors involved in the regulation of many processes, including development, reproduction and homeostasis. Nuclear…	Nuc_rec_co-act	Pfam	P	1
IPR000449	Ubiquitin-associated/translation elongation factor EF1B, N-terminal	GO:0005515	protein binding	UBA domains are a commonly occurring sequence motif of approximately 45 amino acid residues that are found in diverse proteins involved in the ubiquitin/proteasome pathway, DNA excision-repair, and cell signalling via protein kinases. The human homologue of yeast Rad23A is one example of a nucleotide excision-repair protein that contains both an internal and a C-terminal UBA domain. The solution …	UBA	Pfam	P	1
IPR014920	Nuclear receptor coactivator, Ncoa-type, interlocking	GO:0035257	nuclear hormone receptor binding	This entry represents the interlocking domain of the eukaryotic nuclear receptor coactivators Ncoa1, Ncoa2 and Ncoa3. The interlocking domain forms a 3-helical non-globular array that forms interlocked heterodimers with its target. Nuclear receptors are ligand-activated transcription factors involved in the regulation of many processes, including development, reproduction and homeostasis. Nuclear…	Nuc_rec_co-act	Pfam	P	1
IPR001715	Calponin homology domain	GO:0005515	protein binding	The calponin homology domain (also known as CH-domain) is a superfamily of actin-binding domains found in both cytoskeletal proteins and signal transduction proteins. It comprises the following groups of actin-binding domains: Actinin-type (including spectrin, fimbrin, ABP-280) (see Cross-reference to INTERPRO: IPR001589); Calponin-type (see Cross-reference to INTERPRO: IPR000557). A comprehensiv…	CH	Pfam	P	1
IPR011616	bZIP transcription factor, bZIP-1	GO:0046983	protein dimerization activity	The basic-leucine zipper (bZIP) transcription factors of eukaryotic are proteins that contain a basic region mediating sequence-specific DNA-binding followed by a leucine zipper region (see Cross-reference to INTERPRO: IPR002158) required for dimerization.	bZIP_1	Pfam	P	1
IPR013763	Cyclin-like	manual	N/A	This cyclin-like domain is found in cyclins, but it is also found as the core domain in transcription factor IIB (TFIIB) and in the retinoblastoma tumour suppressor. It consists of a duplication of a fold consisting of 5 helices, one of them surrounded by the others.	CYCLIN	SMART	P	1
IPR004953	EB1, C-terminal	GO:0008017	microtubule binding	A group of microtubule-associated proteins called +TIPs (plus end tracking proteins), including EB1 (end-binding protein 1) family proteins, label growing microtubules ends specifically in diverse organisms and are implicated in spindle dynamics, chromosome segregation, and directing microtubules toward cortical sites. EB1 members have a bipartite composition: the N-terminal CH domain (Cross-refe…	EB1	Pfam	P	1
IPR024670	B-cell lymphoma 9, beta-catenin binding domain	manual	N/A	The Wnt pathway plays a role in embryonic development, stem cell growth and tumorigenesis. B-cell lymphoma 9 (BCL9) associates with beta-catenin and Tcf in the nucleus when the Wnt pathway is stimulated leading to the transactivation of Wnt target genes. This entry represents a beta-catenin binding domain found in BCL9 and BCL9 homologues.	BCL9	Pfam	P	1
IPR007854	Pre-mRNA polyadenylation factor Fip1	manual	N/A	This short motif is about 40 amino acids in length and is found in the Fip1 protein that is a component of a Saccharomyces cerevisiae (UniProtKB Taxonomy ID 4932) pre-mRNA polyadenylation factor that directly interacts with poly(A) polymerase. This region of Fip1 is needed for the interaction with the Yth1 subunit of the complex and for specific polyadenylation of the cleaved mRNA precursor .	Fip1	Pfam	P	1
IPR012943	Spindle associated	manual	N/A	Proteins with this domain associate with the spindle body during cell division.	Microtub_assoc	Pfam	P	1
IPR013655	PAS fold-3	GO:0005515	protein binding	The PAS fold corresponds to the structural domain that has previously been defined as PAS and PAC motifs. The PAS fold appears in archaea, eubacteria and eukarya. The PAS domain contains a sensory box, or S-box domain that occupies the central portion of the PAS domain but is more widely distributed. It is often tandemly repeated. Known prosthetic groups bound in the S-box domain include haem in …	PAS_3	Pfam	P	1

## Sheet: Class legend
	Name	Count
D	DNA-binding	1988
P	protein interaction	1566
H	histone modification	180
K	kinase	450
O	other	635
